# Supplementary material for: Post-Lockdown Effects on Students’ Mental Health in Romania: Perceived Stress – The Impact of Missing Daily Social Interactions and Boredom Proneness
Source: Preprints.org preprint supplement (doi:10.20944/preprints202107.0473.v1), 2021-07-21
Supplement: Supplementary file 1 [file supplementary]

| Sociodemographic variables |                       | Level of stress |        |      | Total |
|----------------------------|-----------------------|-----------------|--------|------|-------|
|                            |                       | Low             | Medium | High |       |
| Gender                     | Male                  | 167             | 61     | 19   | 247   |
|                            | Female                | 283             | 121    | 71   | 475   |
| Place of residence         | Rural                 | 324             | 133    | 60   | 517   |
|                            | Urban                 | 126             | 49     | 30   | 205   |
| Living during lockdown     | Urban blocks of flats | 218             | 87     | 34   | 339   |
|                            | Rural block of flats  | 4               | 3      | 2    | 9     |
|                            | Urban detached house  | 90              | 42     | 20   | 152   |
|                            | Rural detached house  | 138             | 50     | 34   | 222   |
| Density                    | 1 person              | 13              | 11     | 4    | 28    |
|                            | 2 people              | 103             | 23     | 18   | 144   |
|                            | 3 people              | 170             | 60     | 25   | 255   |
|                            | > 3 people            | 164             | 88     | 43   | 295   |

**Figure 1.** Sociodemographic variables distribution depending on level of perceived stress.
